# Supplementary material for: Impacts of high dose 3.5 GHz cellphone radiofrequency on zebrafish embryonic development
Source: PLoS One. 2020 Jul 9;15(7):e0235869. doi: 10.1371/journal.pone.0235869 (PMC7347199; doi:10.1371/journal.pone.0235869)
Supplement: S1 File — (XLSX) [file pone.0235869.s002.xlsx]

## Sheet: Morphology
conc	Experiment #	plate.id	MO24	DP24	SM24	NC24	MORT	YSE_	AXIS	EYE_	SNOU	JAW_	OTIC	PE__	BRAI	SOMI	PFIN	CFIN	PIG_	CIRC	TRUN	SWIM	NC__	TR__	any.except.MORT	any.effect
Control	1	19905	0	0	0	0	0	0	0	0	0	0	0	0	0	0	0	0	0	0	0	0	0	0	0	0
RFR	1	19905	0	0	0	0	0	0	2.08	0	0	0	0	0	0	0	0	2.08	0	0	2.08	0	0	0	2.08	2.08
Control	2	19906	0	0	0	0	0	0	2.13	0	2.13	6.38	0	10.64	2.13	0	0	0	0	0	0	0	0	0	10.64	10.64
RFR	2	19906	0	0	0	0	0	0	0	0	0	0	0	2.17	0	0	0	0	0	0	0	0	0	0	2.17	2.17
Control	3	20062	0	0	0	0	0	0	0	0	0	0	0	0	0	0	0	0	0	0	0	0	0	0	0	0
RFR	3	20062	0	0	0	0	0	2.13	0	2.13	2.13	2.13	0	2.13	0	0	2.13	0	0	0	0	0	0	0	2.13	2.13

## Sheet: Morphology Fisher's Exact
conc	Experiment #	MO24	DP24	SM24	NC24	MORT	YSE_	AXIS	EYE_	SNOU	JAW_	OTIC	PE__	BRAI	SOMI	PFIN	CFIN	PIG_	CIRC	TRUN	SWIM	NC__	TR__	any.except.MORT	any.effect
Control	1	1	1	1	1	1	1	1	1	1	1	1	1	1	1	1	1	1	1	1	1	1	1	1	1
RFR	1	1	1	1	1	1	1	0.5	1	1	1	1	1	1	1	1	0.5	1	1	0.5	1	1	1	0.5	0.5
Control	2	1	1	1	1	1	1	0.7527	1	0.7527	0.6615	1	0.6301	0.7527	1	1	1	1	1	1	1	1	1	0.6301	0.6301
RFR	2	1	1	1	1	1	1	1	1	1	1	1	0.9859	1	1	1	1	1	1	1	1	1	1	0.9859	0.9859
Control	3	1	1	1	1	1	1	1	1	1	1	1	1	1	1	1	1	1	1	1	1	1	1	1	1
RFR	3	1	1	1	1	1	0.4947	1	0.4947	0.4947	0.4947	1	0.4947	1	1	0.4947	1	1	1	1	1	1	1	0.4947	0.4947

## Sheet: Startle response AUC
conc	units	count	org_ss	perc	ss_more_70perc	AUC	PercDiff	AUC.Pval	significance p<0.01	significance p<0.01 and 50% cutoff	activity	Comments
Control		139	144	0.97	TRUE	80.911	0	1	NA	NA	NA	NA
RFR	um	141	144	0.98	TRUE	65.225	-19.386	0.787	NA	NA	NA	NA

## Sheet: Photomotor response
conc	chemical.name	count	org_ss	perc	ss_more_70perc	interval	AUC	Pval	RelativeRatio	significance p<0.01	activity	Sig
Control	5G	139	144	0.97	TRUE	Dark	54.204	1	0	NA	NA	NA
RFR	5G	141	144	0.98	TRUE	Dark	49.311	0.306	0.024	NA	NA	NA
Control	5G	139	144	0.97	TRUE	Light	23.02	1	0	NA	NA	NA
RFR	5G	141	144	0.98	TRUE	Light	36.6	0.49	-0.939	NA	NA	NA

## Sheet: Startle response peak
conc	count	org_ss	ss_more_70perc	Peak.no	Peak_dist	Peak.pval	PeakDiff	significance p<0.05
Control	139	144	TRUE	4	4.704	1	0	NA
RFR	141	144	TRUE	4	3.924	0.045	-16.579	YES

## Sheet: Temperatures
	Control			RFR exposure
Exposure beginning	27.9	28.6	28.9	28.4	28.9	28.1
Exposure end	28.2	28.8	28.9	28.2	28.4	28.2
